## RESEARCH ARTICLE

# Photoperiodic induction without light-mediated circadian entrainment in a High Arctic resident bird

Daniel Appenroth<sup>1</sup>, Vebjørn J. Melum<sup>1</sup>, Alexander C. West<sup>1</sup>, Hugues Dardente<sup>2</sup>, David G. Hazlerigg<sup>1,‡</sup> and Gabriela C. Wagner<sup>\*,1</sup>

## ABSTRACT

Organisms use changes in photoperiod to anticipate and exploit favourable conditions in a seasonal environment. While species living at temperate latitudes receive day length information as a year-round input, species living in the Arctic may spend as much as two-thirds of the year without experiencing dawn or dusk. This suggests that specialised mechanisms may be required to maintain seasonal synchrony in polar regions. Svalbard ptarmigan (*Lagopus muta hyperborea*) are resident at 74–81°N latitude. They spend winter in constant darkness (DD) and summer in constant light (LL); extreme photoperiodic conditions under which they do not display overt circadian rhythms. Here, we explored how Arctic adaptation in circadian biology affects photoperiodic time measurement in captive Svalbard ptarmigan. For this purpose, DD-adapted birds, showing no circadian behaviour, either remained in prolonged DD, were transferred into a simulated natural photoperiod (SNP) or were transferred directly into LL. Birds transferred from DD to LL exhibited a strong photoperiodic response in terms of activation of the hypothalamic thyrotropin-mediated photoperiodic response pathway. This was assayed through expression of the *Eya3*, *Tshb* and deiodinase genes, as well as gonadal development. While transfer to SNP established synchronous diurnal activity patterns, activity in birds transferred from DD to LL showed no evidence of circadian rhythmicity. These data show that the Svalbard ptarmigan does not require circadian entrainment to develop a photoperiodic response involving conserved molecular elements found in temperate species. Further studies are required to define how exactly Arctic adaptation modifies seasonal timer mechanisms.

**KEY WORDS:** Photoperiodism, Circadian, Seasonal reproduction, Pars tuberalis, Eyes absent, Deiodinase, Svalbard ptarmigan

## INTRODUCTION

Animals in temperate and high latitudes use changes in photoperiod (day length) to anticipate upcoming seasons and adjust physiology and behaviour accordingly. The involvement of circadian clocks in this photoperiodic time measurement was first suggested by Erwin Bünning, who proposed a so-called ‘external coincidence’ mechanism. According to the Bünning hypothesis (Bünning, 1936), organisms express an innate circadian rhythm of photo-inducibility and light exposure coinciding with the photo-inducible

phase of this rhythm triggers a photoperiodic response. In order to test the Bünning hypothesis, experimental approaches based on artificial light exposures, such as night break experiments, have been employed (Bünning, 1936; Elliott et al., 1972; Follett and Sharp, 1969; Follett et al., 1992; Gwinner and Eriksson, 1977; Hammer and Enright, 1967; Pittendrigh, 1972). Night break experiments trigger a long day response by combining a short photoperiod with a nocturnal light pulse that occurs in the photo-inducible phase. Positive results of these experiments across diverse taxonomic groups favour a circadian-based photoperiodic readout mechanism.

In birds and mammals, photoperiodic effects on reproduction depend on changes in hypothalamic gonadotrophin releasing hormone (GnRH) secretion at the median eminence, and recent evidence points to a coincidence timer mechanism in the adjacent pars tuberalis (PT) as the key upstream control mechanism (Dardente et al., 2010; Hazlerigg and Loudon, 2008; Lincoln et al., 2002; Masumoto et al., 2010; Nakao et al., 2008; Yasuo et al., 2003; Yoshimura et al., 2003). Within the PT, long photoperiods (LPs) stimulate the expression of the thyroid stimulating hormone (TSH)  $\beta$  subunit gene (*Tshb*) (Nakao et al., 2008). LP-induced expression of TSH leads to increased *Dio2* expression in the mediobasal hypothalamus (MBH), through a cAMP-dependent pathway in neighbouring ependymal cells known as tanycytes (Bolborea et al., 2015; Hanon et al., 2008; Nakao et al., 2008; Ono et al., 2008). *DIO2* locally converts thyroxine ( $T_4$ ) to the bioactive triiodothyronine ( $T_3$ ) by outer ring deiodination, thus increasing hypothalamic  $T_3$  concentration under LPs. In long day breeding birds and mammals, this in turn increases the release of GnRH in the median eminence, ultimately leading to gonadal activation (Yamamura et al., 2004, 2006; Yoshimura et al., 2003). Conversely, under short photoperiod, low levels of TSH in the PT coincide with increased type III iodothyronine deiodinase (*Dio3*) expression in tanycytes, keeping the hypothalamic  $T_3$  concentration low and promoting gonadal inactivation (Yasuo et al., 2005). The reciprocal regulation of *Dio2/Dio3* expression and the resulting bioactive  $T_3$  concentration in the MBH is at the core of photoperiodic control of seasonal reproduction and has become a central paradigm in photoperiodic time measurement.

Several lines of evidence suggest that this PT-mediated readout system is circadian based. First, in both birds and mammals so-called ‘clock genes’ show characteristic rhythmical expression in the PT/MBH region, consistent with a possible coincidence timer mechanism (Johnston et al., 2005; Lincoln et al., 2002; Tournier et al., 2007; Yasuo et al., 2003, 2004). Secondly, in the Japanese quail (*Coturnix japonica*) photoperiodic induction of *Dio2* and downstream physiological responses can be triggered by night break experiments (Yoshimura et al., 2003), implying control through a coincidence timer mechanism. Further evidence for the circadian basis on the hypothalamic long day response derives from research on eyes absent 3 (EYA3). In mammals, EYA3 has been proposed to act as a transcriptional co-activator at the *Tshb* gene promoter and analysis of the ovine *Eya3* promoter demonstrated that its expression

<sup>1</sup>Arctic Chronobiology and Physiology, University of Tromsø, 9019 Tromsø, Norway.

<sup>2</sup>Physiologie de la Reproduction et des Comportements, INRA, CNRS, IFCE, Université de Tours, 37380 Nouzilly, France.

<sup>‡</sup>Present address: NIBIO, Divisjon for skog og utmark, Holt, Tromsø, Norway.

<sup>‡</sup>Author for correspondence (david.hazlerigg@uit.no)

 D.G.H., 0000-0003-4884-8409

is controlled by circadian clock genes (Dardente et al., 2010; Masumoto et al., 2010).

Circadian-based models for photoperiodic time measurement place an emphasis on robust circadian cycles of clock gene expression. This raises the question of what happens in species living at Arctic latitudes. Light–dark cycles are absent for extended periods of the year and under such circumstances daily rhythmicity in behaviour and endocrinology breaks down completely (Reierth and Stokkan, 1998; Reierth et al., 1999; Stokkan et al., 1994; van Oort et al., 2005, 2007). Loss of behavioural and endocrine circadian rhythmicity does not necessarily imply loss of circadian-based photoperiodic response circuits, especially in birds where circadian organisation involves multiple circadian oscillators (Cassone, 2014). Moreover, in temperate bird species, lesioning studies resolve behavioural organisation from photoperiodic sensitivity (Binkley et al., 1972; Menaker and Keatts, 1968; Menaker et al., 1970; Rani et al., 2007; Siopes and Wilson, 1974; Wilson, 1991). Nevertheless, adaptation to the Arctic might have had a substantial impact on the entire circadian system, which could also affect circadian-based photoperiodic induction. Fibroblast cultures from reindeer show arrhythmic clock gene expression (Lu et al., 2010) and *in silico* analysis on clock genes revealed mutations that might impact circadian rhythm generation (Lin et al., 2019). If Arctic animals cannot sustain circadian rhythmicity in the polar day and polar night, this might limit photoperiodic responses through coincidence timing to those phases of the year with a robust light–dark cycle.

To investigate this, we have performed photoperiod manipulations in captive Svalbard ptarmigan (*Lagopus muta hyperborea* Sundevall 1845), the northernmost resident herbivorous bird species (Fig. 1). Svalbard ptarmigan are highly seasonal in their breeding physiology (Steen and Unander, 1985; Stokkan et al., 1988, 1986) and become behaviourally arrhythmic around the solstices (i.e. during the polar night and the polar day) (Reierth and Stokkan, 1998). Similar dampening of melatonin rhythmicity has also been observed (Reierth et al., 1999).

In order to test if a light–dark cycle is necessary to induce a long day response in Svalbard ptarmigan, we transferred birds, acclimated to constant darkness (DD), either into a gradually increasing photoperiod or directly into constant light (LL). The former group therefore received a rhythmic light–dark cycle while the latter did not. The control group remained in DD. We measured gonadal mass and behavioural activity as well as *Eya3*, *Tsh $\beta$* , *Dio2* and *Dio3* expression in the PT/MBH region.

## MATERIALS AND METHODS

### Experimental animals and housing

All animals were kept in accordance of the EU directive 201/63/EU under a licence provided by the Norwegian Food Safety authority (Mattilsynet, FOTS 7971). Chicks were hatched from eggs laid by captive adult Svalbard ptarmigan at the University of Tromsø

(69°39'N, 18°57'E). Hatching took place between 24 June and 1 August 2017. The chicks were raised either indoors with a photoperiod corresponding to the onset and offset of natural civil twilight in Tromsø or outside on the ground. Upon reaching a body mass of 400–500 g, 29 birds (Table S1) were transferred into individual cages (1.5 m×0.5 m) in light- and temperature-controlled rooms. All birds were transferred at the end of September 2017. Food (standardised protein food; Norgesfor, OK 2400 070316) and water were provided *ad libitum* throughout the study. Female and male birds were housed together.

Controlled lighting was provided by fluorescent strip lights (Osram, L 58 W 830 Lumilux) delivering approximately 1000 lx at floor level. All rooms were further equipped with permanent red illumination (Philips, BR125 IR 250 W). During the initial acclimation phase, the photoperiod was gradually decreased until reaching DD (red light excepted) on 22 December 2017. Birds in DD were held under red light to allow for husbandry. The birds remained in DD for 5 weeks prior to experimental light treatments.

### Experimental light treatment and sampling

After 5 weeks of DD, 5 individuals were sampled as an initial control group. This marked the start of the experiment (point 0). Thereafter, the three experimental groups were transferred to their respective light treatments (Fig. 2 and Table S1). Six birds remained in DD until the end of the experiment, 9 birds were directly transferred into LL and 9 birds were exposed to a simulated natural photoperiod (SNP). The SNP treatment reflected an increase in day length following the progression of civil twilight onset and offset of Longyearbyen, Svalbard (78°13'N 15°38'E; Table S2).

Four individuals were sampled after 38 h in LL. This sampling time was chosen to coincide with acute photoperiodic gene induction as previously reported in the quail MBH and PT (Nakao et al., 2008). Subsequent samplings aimed to investigate chronic changes in gene expression, and were undertaken at single time points on the following days: After 5 weeks, 4 individuals were sampled from the SNP group as they reached LD 12:12. This sampling was performed 3.5–4.5 h after lights on. After 10 weeks of light treatment, all remaining birds from all groups were sampled. The SNP group had reached LL through a gradual increase in photoperiod 4 days before the final sampling. All groups were euthanised between 09:00 h and 15:00 h local time. The DD group was euthanised on the day after the LL and SNP group. Sampling of birds in DD was performed under dim red light only. Brains were removed after euthanasia and rapidly transferred onto a cooled metal block until stored at  $-80^{\circ}\text{C}$ . Testes and ovaries were removed and measured post mortem.

### Activity

Locomotor activity of all experimental birds was continuously recorded as movement per minute by passive infrared sensors,



**Fig. 1. Svalbard ptarmigan (*Lagopus muta hyperborea*) and where to find them.** (A) A male in white winter plumage and a female in brown summer plumage (photo credit: Ida-Helene Sivertsen). (B) The Svalbard ptarmigan is a subspecies of the rock ptarmigan (*Lagopus muta*) and inhabits the High Arctic archipelago of Svalbard (74–81°N latitude).



**Fig. 2. Experimental design.** Constant darkness-adapted (DD) birds were either transferred into constant light (LL), simulated natural photoperiod (SNP) or retained under DD. Red arrowheads indicate sampling points.

mounted on the cage doors. Data were collected by an Actimetrics CL200 USB interface coupled to ClockLab data acquisition software (version 2.61).

### cDNA cloning and *in situ* hybridisation

Probe synthesis and *in situ* hybridisation were performed as described in Lomet et al. (2018). RNA was extracted from Svalbard ptarmigan brain tissue using TriReagent (Sigma) and converted into cDNA using Omniscript RT kit (Qiagen). The Icelandic rock ptarmigan genome (Kozma et al., 2016) was used to design PCR primers to amplify cDNA fragments for *Tshb*, *Eya3*, *Dio2* and *Dio3*. PCR was performed with Taq DNA polymerase (Qiagen). PCR products of correct sizes were extracted and cloned into pGEMT easy vectors (Promega). The inserts (Table S3) were sequenced (Eurofins Sequencing services, Germany) and verified against the reference genome.

Cloned vectors were stored at  $-20^{\circ}\text{C}$  until further use. Prior to hybridisation, vectors were linearised and transcribed using a Promega transcription kit in combination with a  $^{35}\text{S}$ -UTP isotope (PerkinElmer) to obtain radioactively labelled complementary riboprobes. The riboprobes were purified with illustra MicroSpin G-50 columns (GE healthcare) and incorporation of  $^{35}\text{S}$ -UTP was measured by a liquid scintillation counter (Triathler multilabel tester, Hidex).

Frozen brains were cryosectioned at  $20\ \mu\text{m}$  and sections containing PT and MBH were mounted to pre-coated adhesion slides (SuperFrost Plus, VWR). Brain sections were fixed in 4% paraformaldehyde ( $0.1\ \text{mol l}^{-1}$  phosphate buffer) for 20 min at  $4^{\circ}\text{C}$  and rinsed twice with  $0.1\ \text{mol l}^{-1}$  phosphate buffer for 5 min. Fixed sections were acetylated with 3.75% v/v of acetic anhydride in  $0.1\ \text{mol l}^{-1}$  triethanolamine buffer ( $0.05\ \text{mol l}^{-1}$  NaOH) and rinsed twice with  $0.1\ \text{mol l}^{-1}$  phosphate buffer for 5 min. Sections were subsequently dehydrated with stepwise increasing ethanol solutions (50%, 70%, 96%, 100% for 3 min each) and dried under vacuum for at least 1 h.

Dried sections were hybridised with  $10^6$  cpm of riboprobe per slide in hybridisation buffer (50% deionised formamide, 10% dextran sulfate,  $1\times$  Denhardt's solution,  $300\ \text{mmol l}^{-1}$  NaCl,  $10\ \text{mmol l}^{-1}$  Tris-HCl,  $10\ \text{mmol l}^{-1}$  DTT,  $1\ \text{mmol l}^{-1}$  EDTA,  $500\ \mu\text{g ml}^{-1}$  tRNA). Hybridisation was performed at  $56^{\circ}\text{C}$  overnight. Hybridised sections were washed with  $4\times$  saline sodium citrate (SSC) solutions ( $3\times 5$  min

and treated with RNase-A solution ( $500\ \text{mmol l}^{-1}$  NaCl,  $1\ \text{mmol l}^{-1}$  Tris-HCl,  $1\ \text{mmol l}^{-1}$  EDTA,  $20\ \mu\text{g ml}^{-1}$ ) for 30 min at  $37^{\circ}\text{C}$ . Subsequent stringency washes were performed in SSC (supplemented with  $1\ \text{mmol l}^{-1}$  DTT) of decreasing concentration:  $2\times$  SSC ( $2\times 5$  min),  $1\times$  SSC ( $1\times 10$  min),  $0.5\times$  SSC ( $1\times 10$  min),  $0.1\times$  SSC (30 min at  $60^{\circ}\text{C}$ ),  $0.1\times$  SSC (rinse).

Slides were dehydrated afterwards in stepwise increasing ethanol solutions (50%, 70%, 96%, 100% for 3 min each) and dried under vacuum. Dried sections were exposed to autoradiographic films (Carestream Kodak BioMax MR film) for 9 to 12 days. Exposed films were developed, fixed and digitalised with an Epson transmission scanner. Optical density (OD) was measured with ImageJ (version 1.51k).

### Analysis

Actograms were produced with the ActogramJ plugin for ImageJ (Schmid et al., 2011) and period length of activity was measured by chi-squared periodograms produced by the same program. Graphs of gene expressions in the PT/MBH region and gonadal mass were prepared in GraphPad Prism 8 (version 8.0.2). The results were plotted as each replicate with lines going through the respective mean of each group at each sampling point. Statistical comparisons were made by one-way ANOVA and Tukey's *post hoc* tests, performed on log transformed values to ensure homogeneity of variances; the threshold for significance was  $P < 0.05$ . Individual values for gene expression with the corresponding gender can be found in Table S1.

## RESULTS

### Activity rhythms

Prior to the experimental treatment, all birds in DD exhibited short episodic bouts of activity with no clear periodicity (Fig. 3, Figs S1 and S2), and for birds continuing on DD the same pattern was maintained. In birds transferred to LL, episodic activity continued, sometimes with ultradian periodicity. Period lengths were typically in the range 3–20 h, and highly variable between individuals. Birds transferred to SNP, based on Svalbard civil twilight progression, showed robust daily rhythms with a period of 24 h ( $P < 0.05$ ).

### Gonads

Testes and ovaries were initially regressed in all groups (Fig. 4A,B) and subsequent development depended on photoperiodic treatment ( $P < 0.0001$  by one-way ANOVA in both cases). Exposure to LL strongly stimulated gonadal maturation for both testes and ovaries, so that after 10 weeks masses increased 22-fold and 93-fold, respectively ( $P < 0.0001$  by Tukey's *post hoc* test in both cases). Gonadal maturation in birds maintained in DD and in female birds under SNP, was negligible (DD, 1.4-fold; SNP, 1.1-fold compared with initial values) while male birds transferred to SNP showed a more modest (3.2-fold) but nonetheless statistically significant increased testicular mass by the end of the study ( $P < 0.001$  by Tukey's *post hoc* test).

### *Eya3* and *Tshb* expression

The expression of *Tshb* and *Eya3* over the course of the study was dependent on photoperiod ( $P < 0.0001$  by one-way ANOVA in both cases) (Figs 4C,D and 5). Expression of both genes was below the detection threshold at week 0, and rose dramatically 38 h after the transfer to LL ( $P < 0.001$  in both cases by Tukey's *post hoc* test). Thereafter expression of both genes was maintained at high levels until the end of the study (week 10). In birds exposed to SNP, levels of both genes remained undetectable 5 weeks after the transfer, when the photoperiod had increased to 12 h of light. Subsequently,



**Fig. 3. Representative actograms and their respective chi-squared periodograms.** (A–C) Birds adapted to constant darkness (DD) were transferred to their respective light treatments on day 10 of the recording (red line) or retained in DD. Actograms (top) are double plotted and grey shadings indicate periods of darkness. Chi-squared periodograms (bottom) were produced for 20 days for the DD group (A) or 10 days before and within experimental photoperiod for the LL and SNP group [B, C; upper periodogram: 10 days before light treatment (DD), lower periodogram: 10 days in light treatment].  $Q_p$  values above the red line in the periodograms indicate significant periods ( $P < 0.05$ ). IDs of representative birds are given in the respective actograms and periodograms.

after the photoperiod had progressively increased to LL, expression of both genes increased dramatically to values similar to those in the LL treatment group ( $P < 0.001$  compared with initial values by *post hoc* Tukey's test). In birds maintained on DD, expression levels of both genes remained at basal levels throughout the experiment.

#### **Dio2 and Dio3 expression**

*Dio2* and *Dio3* in the ependymal region of the MBH showed reciprocal changes in expression over the course of the study

( $P < 0.0001$  by one-way ANOVA) (Figs 4E,F and 5). Initial *Dio2* expression was relatively weak, while *Dio3* expression was relatively strong (week 0). Transfer to LL increased *Dio2* expression 2.5-fold within 38 h (week 0 vs 38 h LL;  $P < 0.05$  by *post hoc* Tukey's test), while over the same period, *Dio3* expression was suppressed to background levels (45-fold decrease;  $P < 0.01$  by Tukey's *post hoc* test). Under continued LL exposure, elevated *Dio2* levels and suppressed *Dio3* levels were maintained to the end of the experiment.



**Fig. 4. Gonadal development and gene expression in the MBH measured by *in situ* hybridisation.** (A,B) Gonad mass was measured post mortem. (C–F) Hypothalamic gene expression was measured before (point 0) and 10 weeks after the transfer into the respective light regime. Additionally, gene expression was measured after 38 h in LL and 5 weeks after the transfer into the simulated natural photoperiod (LD 12:12). The gene expression is given in optical density (OD) and each replicate is plotted with dotted lines passing through the respective mean.

Expression levels of *Dio2* and *Dio3* from birds under SNP gradually increased and decreased, respectively, over the course of the study. In both cases, expression levels after 5 weeks under SNP did not differ from initial values, while levels at week 10 were increased 2.3-fold for *Dio2* and decreased 60-fold for *Dio3* ( $P < 0.05$  and  $0.01$ , respectively, by *post hoc* Tukey's test). Under constant darkness, no significant changes in either *Dio2* or *Dio3* expression were observed (Figs 4E,F, 5).

## DISCUSSION

In our experiment, we transferred DD-acclimated Svalbard ptarmigan either into a simulated natural photoperiod or directly

into LL. Both photoperiodic treatments caused increased *Eya3* and *Tshβ* expression and changes in the expression of downstream deiodinases, but birds transferred from DD to LL displayed no circadian behaviour. This absence of circadian rhythmicity, in combination with the lack of an external light–dark cycle, might question the circadian basis of the long day response in Svalbard ptarmigan.

According to theory, a circadian-based rhythm of photo-inducibility triggers a photoperiodic response if light exposure occurs during the photoinducible phase (Bünning, 1936). Modern formulations of Bünning's model focus on events in the PT and



**Fig. 5. Representative *in situ* hybridisation radiographs for each gene and each sampling point.** Top picture is a whole-brain radiograph for *Dio2* highlighting the region of interest [pars tuberalis (PT) and mediobasal hypothalamus (MBH)]. Radiographs for the respective sampling points show the PT/MBH region (bottom).

MBH, where night-break protocols induce a long day response in local *Tshβ* expression and downstream effects on hypothalamic deiodinase genes (Dardente et al., 2010; Masumoto et al., 2010;

Yoshimura et al., 2003). In sheep, promoter analysis of *Eya3*, a co-activator for *Tshβ*, demonstrates transcriptional control through clock genes, further emphasising the circadian basis for photoperiodic time measurement (Dardente et al., 2010).

In contrast, previous studies on Arctic animals report the absence of circadian rhythmicity and suggest this as a possible adaptation to polar latitudes, allowing around the clock foraging in constant Arctic light conditions (Lin et al., 2019; Lu et al., 2010; Reierth and Stokkan, 1998; Reierth et al., 1999; van Oort et al., 2005, 2007). Our study confirms the absence of circadian activity rhythms in DD and LL. In a separate experiment, we further found no evidence of circadian body temperature rhythms in DD and LL (D.A., A. Nord, D.G.H. and G.C.W., unpublished results).

This absence of behavioural and physiological rhythmicity does not exclude the possibility of latent circadian rhythmicity persisting in a coincidence timer mechanism. In non-Arctic bird species, LL can disrupt circadian activity rhythms but still triggers a photoperiodic response in reproduction (Agarwal et al., 2017; Lumineau and Guyomarc'h, 2003; Simpson and Follett, 1982; Wever, 1980). Moreover, Japanese quail show sustained hypothalamic expression of clock genes in LL, despite behavioural arrhythmicity (Lumineau and Guyomarc'h, 2003; Simpson and Follett, 1982; Yasuo et al., 2003). It therefore remains possible that a sustained rhythm of photo-inducibility may also persist within the PT/MBH region of Arctic Svalbard ptarmigan in constant photic conditions. Consequently, the DD-to-LL treatment triggers a long day response as light coincides with the photoinducible phase repeatedly after the transfer (Fig. 6A). Alternatively, the transition from DD to LL might initiate a dampening rhythm of photo-inducibility (Fig. 6B), either by direct induction or by bringing internally desynchronised cellular rhythms into phase (Balsalobre et al., 1998; Nagoshi et al., 2004; Welsh et al., 2004). This scenario would have similar consequences to the persistent rhythmical photo-inducibility described previously and they might prove difficult to resolve from one another.

Finally, we do not formally exclude that an hour-glass type mechanism operates in these birds. Under this scenario, induction relies on the progressive accumulation of a light dependent factor under LL (Fig. 6C). However, we favour a rhythm-based model since our molecular characterization of the photoperiodic response shows broad conservation with species known to rely on



**Fig. 6. Proposed mechanisms of photoperiodic time measurement in the Arctic.** Svalbard ptarmigan show hypothalamic gene expression characteristic for seasonal reproduction when transferred from DD (grey shading) into LL (white; D). This process has been proposed to consist of a circadian rhythm of photo-inducibility and coinciding light. (A) Despite absent rhythm in activity, a light sensitivity rhythm might be sustained in the PT and MBH throughout constant conditions. (B) The rhythm of photo-inducibility might also be initiated by one dawn either by inducing the rhythm or by synchronising individual cells. (C) Lastly, the photoperiodic response might be circadian independent and instead based on the accumulation of a light-dependent factor.

coincidence timing, such as quail (Nakao et al., 2008; Yasuo et al., 2005; Yoshimura et al., 2003) or sheep (Dardente et al., 2010).

Similarly to Svalbard ptarmigan transferred from DD to LL, birds subjected to a simulated light–dark cycle also showed increased *Eya3* and *Tshβ* expression, and changes in the expression of downstream deiodinases at the final sampling point in LL, but not earlier in the study when the birds were on LD 12:12 (Fig. 4E,F). This is consistent with other mammals and birds which require a photoperiod of between 12.5 and 14 h for acute changes of photoperiodic genes in PT and MBH (Hanon et al., 2010, 2008; Król et al., 2012; Nakao et al., 2008; Ono et al., 2008). By the end of the study, birds in the SNP group showed only limited gonadal development (Fig. 4A,B). This is in line with earlier reports that wild Svalbard ptarmigan undergo a delay of several weeks in gonadal development even after exposure to long days (Stokkan et al., 1986).

In summary, our study showed that a High Arctic bird relies on the same molecular photoperiodic factors in the PT and MBH to initiate reproduction as other seasonal mammals and birds. Similar responses were measured in birds going through a SNP and birds directly transferred from DD to LL. The latter observation can reasonably be explained by a variant form of coincidence timer mechanism similar to that seen in temperate species. Further experiments using night break or Nanda Hamner protocols (Saunders, 2005) provide a route to test this hypothesis.

#### Acknowledgements

The Authors thank the animal technicians from the Arctic Chronobiology and Physiology research group: Hans Lian, Hans-Arne Solvang and Renate Thorvaldsen. Past, present, and future projects would not be possible without their dedication and experience. We would also like to thank Andreas Nord for all his help with animal handling and the knowledge he shared.

#### Competing interests

The authors declare no competing or financial interests.

#### Author contributions

Conceptualization: D.G.H., D.A., G.C.W.; Methodology: D.A., H.D., G.C.W.; Formal analysis: D.A., G.C.W.; Investigation: D.A., V.J.M., H.D., G.C.W.; Resources: D.G.H., H.D.; Writing - original draft: D.G.H., D.A.; Writing - review & editing: D.G.H., D.A., V.J.M., A.C.W., H.D., G.C.W.; Visualization: D.A.; Supervision: D.G.H., G.C.W.; Project administration: D.G.H., G.C.W.; Funding acquisition: D.G.H.

#### Funding

This project was supported by grants from the Tromsø Research Foundation (TFS2016DH) and the Human Frontiers Science Program (RGP0030/2015) to D.G.H.

#### Supplementary information

Supplementary information available online at <https://jeb.biologists.org/lookup/doi/10.1242/jeb.220699.supplemental>

#### References

- Agarwal, N., Mishra, I., Komal, R., Rani, S. and Kumar, V. (2017). Circannual testis and moult cycles persist under photoperiods that disrupt circadian activity and clock gene cycles in spotted munia. *J. Exp. Biol.* **220**, 4162–4168. doi:10.1242/jeb.167809
- Balsalobre, A., Damiola, F. and Schibler, U. (1998). A serum shock induces circadian gene expression in mammalian tissue culture cells. *Cell* **93**, 929–937. doi:10.1016/S0092-8674(00)81199-X
- Binkley, S., Kluth, E. and Menaker, M. (1972). Pineal and locomotor activity. *J. Comp. Physiol.* **77**, 163–169. doi:10.1007/BF00693604
- Bolborea, M., Helfer, G., Ebling, F. J. P. and Barrett, P. (2015). Dual signal transduction pathways activated by TSH receptors in rat primary tanycyte cultures. *J. Mol. Endocrinol.* **54**, 241–250. doi:10.1530/JME-14-0298
- Bünning, E. (1936). Die endogene tagesrhythmik als grundlage der photoperiodischen reaktion. *Ber. Dtsch. Botan. Ges.* **54**, 590–607.
- Cassone, V. M. (2014). Avian circadian organization: a chorus of clocks. *Front. Neuroendocrinol.* **35**, 76–88. doi:10.1016/j.yfme.2013.10.002

- Dardente, H., Wyse, C. A., Birnie, M. J., Dupré, S. M., Loudon, A. S. I., Lincoln, G. A. and Hazlerigg, D. G. (2010). A molecular switch for photoperiod responsiveness in mammals. *Curr. Biol.* **20**, 2193–2198. doi:10.1016/j.cub.2010.10.048
- Elliott, J. A., Stetson, M. H. and Menaker, M. (1972). Regulation of testis function in golden hamsters: a circadian clock measures photoperiodic time. *Science* **178**, 771–773. doi:10.1126/science.178.4062.771
- Follett, B. and Sharp, P. (1969). Circadian rhythmicity in photoperiodically induced gonadotrophin release and gonadal growth in the quail. *Nature* **223**, 968. doi:10.1038/223968b0
- Follett, B. K., Kumar, V. and Juss, T. S. (1992). Circadian nature of the photoperiodic clock in Japanese quail. *J. Comp. Physiol. A* **171**, 533–540. doi:10.1007/BF00194586
- Gwinner, E. and Eriksson, L.-O. (1977). Circadiane rhythmik und photoperiodische Zeitmessung beim star (*Sturnus vulgaris*) Circadian rhythms and photoperiodic time measurement in the starling (*Sturnus vulgaris*). *J. Ornithol.* **118**, 60–67. doi:10.1007/BF01647358
- Hammer, W. and Enright, J. (1967). Relationships between photoperiodism and circadian rhythms of activity in the house finch. *J. Exp. Biol.* **46**, 43–61.
- Hanon, E. A., Lincoln, G. A., Fustin, J.-M., Dardente, H., Masson-Pévet, M., Morgan, P. J. and Hazlerigg, D. G. (2008). Ancestral TSH mechanism signals summer in a photoperiodic mammal. *Curr. Biol.* **18**, 1147–1152. doi:10.1016/j.cub.2008.06.076
- Hanon, E. A., Routledge, K., Dardente, H., Masson-Pévet, M., Morgan, P. J. and Hazlerigg, D. G. (2010). Effect of photoperiod on the thyroid-stimulating hormone neuroendocrine system in the European hamster (*Cricetus cricetus*). *J. Neuroendocrinol.* **22**, 51–55. doi:10.1111/j.1365-2826.2009.01937.x
- Hazlerigg, D. and Loudon, A. (2008). New insights into ancient seasonal life timers. *Curr. Biol.* **18**, R795–R804. doi:10.1016/j.cub.2008.07.040
- Johnston, J. D., Ebling, F. J. P. and Hazlerigg, D. G. (2005). Photoperiod regulates multiple gene expression in the suprachiasmatic nuclei and pars tuberalis of the Siberian hamster (*Phodopus sungorus*). *Eur. J. Neurosci.* **21**, 2967–2974. doi:10.1111/j.1460-9568.2005.04148.x
- Kozma, R., Melsted, P., Magnússon, K. P. and Höglund, J. (2016). Looking into the past—the reaction of three grouse species to climate change over the last million years using whole genome sequences. *Mol. Ecol.* **25**, 570–580. doi:10.1111/mec.13496
- Król, E., Douglas, A., Dardente, H., Birnie, M. J., Van Der Vinne, V., Eijer, W. G., Gerkema, M. P., Hazlerigg, D. G. and Hut, R. A. (2012). Strong pituitary and hypothalamic responses to photoperiod but not to 6-methoxy-2-benzoxazolinone in female common voles (*Microtus arvalis*). *Gen. Comp. Endocrinol.* **179**, 289–295. doi:10.1016/j.ygcen.2012.09.004
- Lin, Z., Chen, L., Chen, X., Zhong, Y., Yang, Y., Xia, W., Liu, C., Zhu, W., Wang, H., Yan, B. et al. (2019). Biological adaptations in the Arctic cervid, the reindeer (*Rangifer tarandus*). *Science* **364**, eaav6312. doi:10.1126/science.aav6312
- Lincoln, G., Messenger, S., Andersson, H. and Hazlerigg, D. (2002). Temporal expression of seven clock genes in the suprachiasmatic nucleus and the pars tuberalis of the sheep: evidence for an internal coincidence timer. *Proc. Natl. Acad. Sci. USA* **99**, 13890–13895. doi:10.1073/pnas.212517599
- Lomet, D., Cognié, J., Chesneau, D., Dubois, E., Hazlerigg, D. and Dardente, H. (2018). The impact of thyroid hormone in seasonal breeding has a restricted transcriptional signature. *Cell. Mol. Life Sci.* **75**, 905–919. doi:10.1007/s00018-017-2667-x
- Lu, W., Meng, Q.-J., Tyler, N. J. C., Stokkan, K.-A. and Loudon, A. S. I. (2010). A circadian clock is not required in an arctic mammal. *Curr. Biol.* **20**, 533–537. doi:10.1016/j.cub.2010.01.042
- Lumineau, S. and Guyomarc'h, C. (2003). Effect of light intensity on circadian activity in developing Japanese quail. *Biol. Rhythm Res.* **34**, 101–113. doi:10.1076/brhm.34.1.101.14083
- Masumoto, K.-H., Ukai-Tadenuma, M., Kasukawa, T., Nagano, M., Uno, K. D., Tsujino, K., Horikawa, K., Shigeyoshi, Y. and Ueda, H. R. (2010). Acute induction of *Eya3* by late-night light stimulation triggers TSHβ expression in photoperiodism. *Curr. Biol.* **20**, 2199–2206. doi:10.1016/j.cub.2010.11.038
- Menaker, M. and Keatts, H. (1968). Extraretinal light perception in the sparrow. II. Photoperiodic stimulation of testis growth. *Proc. Natl. Acad. Sci. USA* **60**, 146–151. doi:10.1073/pnas.60.1.146
- Menaker, M., Roberts, R., Elliott, J. and Underwood, H. (1970). Extraretinal light perception in the sparrow, III: the eyes do not participate in photoperiodic photoreception. *Proc. Natl. Acad. Sci. USA* **67**, 320–325. doi:10.1073/pnas.67.1.320
- Nagoshi, E., Saini, C., Bauer, C., Laroche, T., Naef, F. and Schibler, U. (2004). Circadian gene expression in individual fibroblasts: cell-autonomous and self-sustained oscillators pass time to daughter cells. *Cell* **119**, 693–705. doi:10.1016/j.cell.2004.11.015
- Nakao, N., Ono, H., Yamamura, T., Anraku, T., Takagi, T., Higashi, K., Yasuo, S., Katou, Y., Kageyama, S. and Uno, Y. (2008). Thyrotrophin in the pars tuberalis triggers photoperiodic response. *Nature* **452**, 317–322. doi:10.1038/nature06738
- Ono, H., Hoshino, Y., Yasuo, S., Watanabe, M., Nakane, Y., Murai, A., Ebihara, S., Korf, H.-W. and Yoshimura, T. (2008). Involvement of thyrotrophin in

- photoperiodic signal transduction in mice. *Proc. Natl. Acad. Sci. USA* **105**, 18238-18242. doi:10.1073/pnas.0808952105
- Pittendrigh, C. S.** (1972). Circadian surfaces and the diversity of possible roles of circadian organization in photoperiodic induction. *Proc. Natl. Acad. Sci. USA* **69**, 2734-2737. doi:10.1073/pnas.69.9.2734
- Rani, S., Singh, S. and Kumar, V.** (2007). Photoperiodism, pineal clock and seasonal reproduction in the Indian weaver bird (*Ploceus philippinus*). *J. Ornithol.* **148**, 601-610. doi:10.1007/s10336-007-0236-z
- Reierth, E. and Stokkan, K.-A.** (1998). Activity rhythm in high Arctic Svalbard ptarmigan (*Lagopus mutus hyperboreus*). *Can. J. Zool.* **76**, 2031-2039. doi:10.1139/z98-173
- Reierth, E., Van't Hof, T. J. and Stokkan, K.-A.** (1999). Seasonal and daily variations in plasma melatonin in the high-arctic Svalbard ptarmigan (*Lagopus mutus hyperboreus*). *J. Biol. Rhythms* **14**, 314-319. doi:10.1177/074873099129000731
- Saunders, D. S.** (2005). Erwin Bünning and Tony Lees, two giants of chronobiology, and the problem of time measurement in insect photoperiodism. *J. Insect Physiol.* **51**, 599-608. doi:10.1016/j.jinsphys.2004.12.002
- Schmid, B., Helfrich-Förster, C. and Yoshii, T.** (2011). A new ImageJ plug-in "ActogramJ" for chronobiological analyses. *J. Biol. Rhythms* **26**, 464-467. doi:10.1177/0748730411414264
- Simpson, S. M. and Follett, B. K.** (1982). Formal properties of the circadian rhythm of locomotor activity in Japanese quail. *J. Comp. Physiol.* **145**, 391-398. doi:10.1007/BF00619343
- Siopes, T. D. and Wilson, W. O.** (1974). Extraocular modification of photoreception in intact and pinealectomized coturnix. *Poult. Sci.* **53**, 2035-2041. doi:10.3382/ps.0532035
- Steen, J. B. and Unander, S.** (1985). Breeding biology of the Svalbard rock ptarmigan *Lagopus mutus hyperboreus*. *Ornis Scand.* **16**, 191-197. doi:10.2307/3676630
- Stokkan, K.-A., Sharp, P. J. and Unander, S.** (1986). The annual breeding cycle of the high-arctic Svalbard ptarmigan (*Lagopus mutus hyperboreus*). *Gen. Comp. Endocrinol.* **61**, 446-451. doi:10.1016/0016-6480(86)90232-7
- Stokkan, K.-A., Sharp, P. J., Dunn, I. C. and Lea, R. W.** (1988). Endocrine changes in photostimulated willow ptarmigan (*Lagopus lagopus lagopus*) and Svalbard ptarmigan (*Lagopus mutus hyperboreus*). *Gen. Comp. Endocrinol.* **70**, 169-177. doi:10.1016/0016-6480(88)90107-4
- Stokkan, K.-A., Tyler, N. J. C. and Reiter, R. J.** (1994). The pineal gland signals autumn to reindeer (*Rangifer tarandus tarandus*) exposed to the continuous daylight of the Arctic summer. *Can. J. Zool.* **72**, 904-909. doi:10.1139/z94-123
- Tournier, B. B., Dardente, H., Simonneaux, V., Vivien-Roels, B., Pévet, P., Masson-Pévet, M. and Vuillez, P.** (2007). Seasonal variations of clock gene expression in the suprachiasmatic nuclei and pars tuberalis of the European hamster (*Cricetus cricetus*). *Eur. J. Neurosci.* **25**, 1529-1536. doi:10.1111/j.1460-9568.2007.05421.x
- Van Oort, B. E. H., Tyler, N. J. C., Gerkema, M. P., Folkow, L., Blix, A. S. and Stokkan, K.-A.** (2005). Circadian organization in reindeer. *Nature* **438**, 1095-1096. doi:10.1038/4381095a
- Van Oort, B. E. H., Tyler, N. J. C., Gerkema, M. P., Folkow, L. and Stokkan, K.-A.** (2007). Where clocks are redundant: weak circadian mechanisms in reindeer living under polar photic conditions. *Naturwissenschaften* **94**, 183-194. doi:10.1007/s00114-006-0174-2
- Welsh, D. K., Yoo, S.-H., Liu, A. C., Takahashi, J. S. and Kay, S. A.** (2004). Bioluminescence imaging of individual fibroblasts reveals persistent, independently phased circadian rhythms of clock gene expression. *Curr. Biol.* **14**, 2289-2295. doi:10.1016/j.cub.2004.11.057
- Wever, R. A.** (1980). Circadian rhythms of finches under bright light: Is self-sustainment a precondition for circadian rhythmicity? *J. Comp. Physiol.* **139**, 49-58. doi:10.1007/BF00666194
- Wilson, F. E.** (1991). Neither retinal nor pineal photoreceptors mediate photoperiodic control of seasonal reproduction in American tree sparrows (*Spizella arborea*). *J. Exp. Zool.* **259**, 117-127. doi:10.1002/jez.1402590114
- Yamamura, T., Hirunagi, K., Ebihara, S. and Yoshimura, T.** (2004). Seasonal morphological changes in the neuro-glial interaction between gonadotropin-releasing hormone nerve terminals and glial endfeet in Japanese quail. *Endocrinology* **145**, 4264-4267. doi:10.1210/en.2004-0366
- Yamamura, T., Yasuo, S., Hirunagi, K., Ebihara, S. and Yoshimura, T.** (2006). T3 implantation mimics photoperiodically reduced encasement of nerve terminals by glial processes in the median eminence of Japanese quail. *Cell Tissue Res.* **324**, 175-179. doi:10.1007/s00441-005-0126-8
- Yasuo, S., Watanabe, M., Okabayashi, N., Ebihara, S. and Yoshimura, T.** (2003). Circadian clock genes and photoperiodism: comprehensive analysis of clock gene expression in the mediobasal hypothalamus, the suprachiasmatic nucleus, and the pineal gland of Japanese quail under various light schedules. *Endocrinology* **144**, 3742-3748. doi:10.1210/en.2003-0435
- Yasuo, S., Watanabe, M., Tsukada, A., Takagi, T., Iigo, M., Shimada, K., Ebihara, S. and Yoshimura, T.** (2004). Photoinducible phase-specific light induction of *Cry1* gene in the pars tuberalis of Japanese quail. *Endocrinology* **145**, 1612-1616. doi:10.1210/en.2003-1285
- Yasuo, S., Watanabe, M., Nakao, N., Takagi, T., Follett, B. K., Ebihara, S. and Yoshimura, T.** (2005). The reciprocal switching of two thyroid hormone-activating and-inactivating enzyme genes is involved in the photoperiodic gonadal response of Japanese quail. *Endocrinology* **146**, 2551-2554. doi:10.1210/en.2005-0057
- Yoshimura, T., Yasuo, S., Watanabe, M., Iigo, M., Yamamura, T., Hirunagi, K. and Ebihara, S.** (2003). Light-induced hormone conversion of  $T_4$  to  $T_3$  regulates photoperiodic response of gonads in birds. *Nature* **426**, 178. doi:10.1038/nature02117
